# Supplementary material
Source: publisher figshare collection journal article supplement (https://frontiersin.figshare.com/ndownloader/files/18050339)
Supplement: Supplementary file [file 18050339]

Description of the dataset used for the preparation of the manuscript “Impact of within-tree organ distances on floral induction and fruit growth in apple tree: implication of carbon and gibberellin organ contents”.

**CropLoad\_MFW- Worksheet:** The dataset includes total fruit weight and number, mean fruit weight, trunk cross-sectional area and crop load in 2016 and 2017 at harvest, for the different treatments and within-tree conditions (leaf/fruit presence). Data were also presented for “control additional trees” in 2015, 2016 and 2017.

**FI:** The dataset includes the number of vegetative and reproductive buds (Total\_Number\_V, Total\_Number\_I, respectively) recorded on four branches per tree in spring 2017 and 2018 after full bloom, for the different treatments and within-tree conditions (leaf/fruit presence).

**GA.csv:** The dataset includes information on GA concentrations in shoot apical meristems of ‘*Golden delicious*’ apple cultivar collected in 2017. GA12, GA15, GA24, GA9, GA51, GA4, GA34, GA53, GA44, GA19, GA20, GA29, GA1 and GA8 were quantified for the different treatments and within-tree conditions.

**NSC.csv:** The dataset includes glucose, fructose, sucrose, sorbitol and starch concentration collected in 2017 on leaves, stem, wood and meristems for the different treatments and within-tree conditions.

**photosynthesis.csv:** The dataset includes photosynthesis activity measurements in 2017 for the different treatments and within-tree conditions.
